# Supplementary material for: Erosion-resistant materials demonstrate low interfacial toughness with ice and superior durability
Source: Royal Society of Chemistry journal article supplement (doi:10.1039/d3mh00885a), 2023-01-01
Supplement: d3mh00885a1.pdf [file d3mh00885a1.pdf]

Supplementary information for

**Erosion resistant materials demonstrating low interfacial toughness  
with ice and superior durability.**

*Qimeng Yang, Ali Dolatabadi, Kevin Golovin\**

Mechanical & Industrial Engineering, University of Toronto, 5 King's College Rd, Toronto, ON  
M5S 3G8

\*Email: kevin.golovin@utoronto.ca

**Table S1.** Typical mechanical properties of the erosion resistant materials used in the study.

|         | Young's modulus (GPa)  | Hardness (GPa)       | Thermal conductivity (W/m·K) |
|---------|------------------------|----------------------|------------------------------|
| WC      | 500 – 700 <sup>1</sup> | 15 – 26 <sup>2</sup> | 70 – 110 <sup>3</sup>        |
| SiC     | 250 – 400 <sup>4</sup> | 7 – 26 <sup>4</sup>  | 120 – 150 <sup>5</sup>       |
| Alumina | 200 – 300 <sup>6</sup> | 10 – 15 <sup>7</sup> | 15 – 20 <sup>8</sup>         |
| QC      | 140 – 200 <sup>9</sup> | 5 – 10 <sup>9</sup>  | 4 – 8 <sup>10</sup>          |

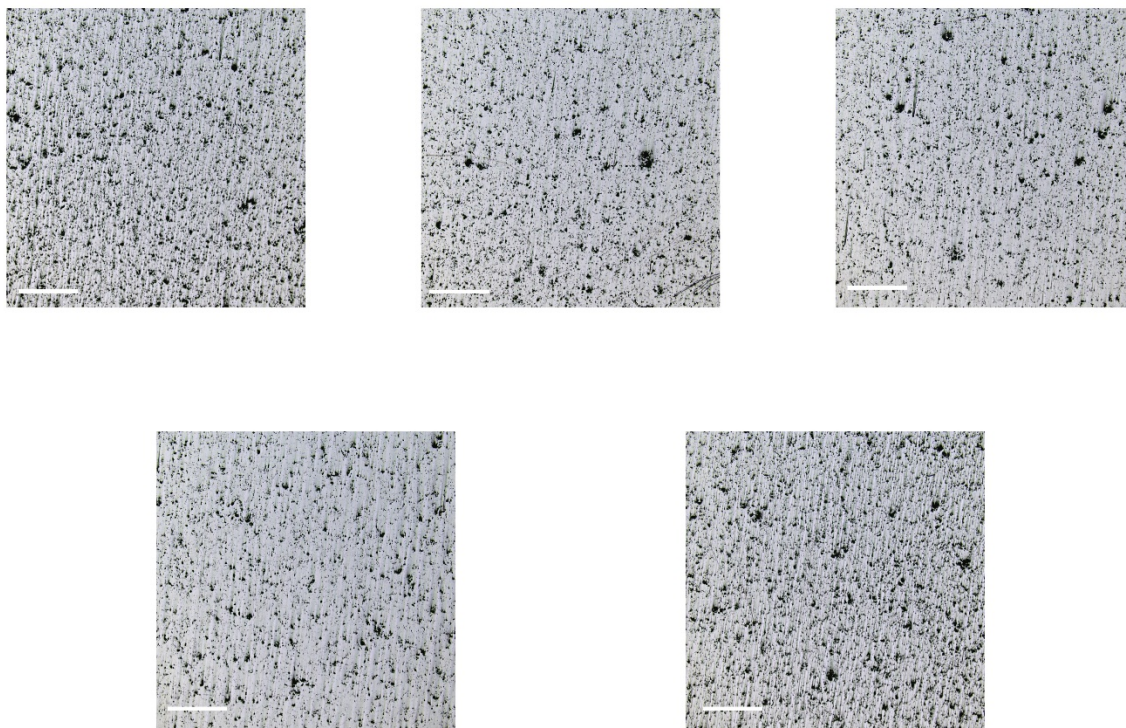

**Figure S1.** Optical images used for analyzing the ‘rougher’ areas of the QC coating. The dark contrast was recognized as regions with higher roughness and the area percentage of those area was measured by ImageJ. Length of scale bars is 0.5 mm.

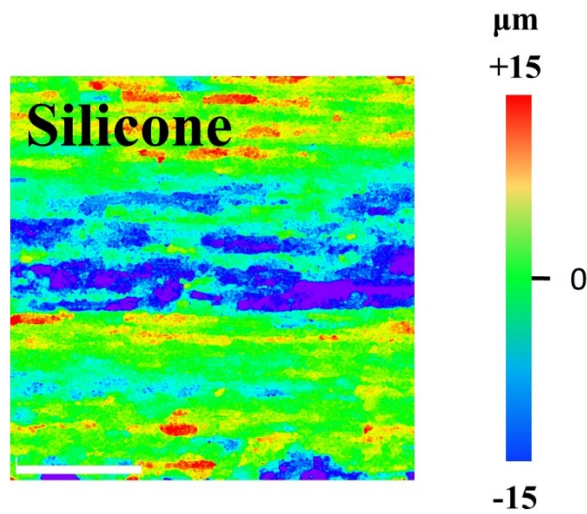

**Figure S2.** 2D heightmap on Silicone substrate after linear erosion test. The roughness of the linear abraded Silicone surface was much higher than that on the erosion resistant materials. The length of the scale bar is 200  $\mu\text{m}$ .

## References

1. Santhanam, A. T. Application of transition metal carbides and nitrides in industrial tools. *The Chemistry of Transition Metal Carbides and Nitrides* 28–52 (1996) doi:10.1007/978-94-009-1565-7\_2.
2. Lee, H. C. & Gurland, J. Hardness and deformation of cemented tungsten carbide. *Materials Science and Engineering* **33**, 125–133 (1978).
3. Zhong, Y. *et al.* Transition metal carbides and nitrides in energy storage and conversion. *Advanced Science* **3**, (2015).
4. Vargas-Gonzalez, L., Speyer, R. F. & Campbell, J. Flexural strength, fracture toughness, and hardness of silicon carbide and boron carbide armor ceramics. *Int J Appl Ceram Technol* **7**, 643–651 (2010).

5. Salce, B. *et al.* Thermal conductivity of pure and Si-doped CuGeO<sub>3</sub>. *Physics Letters, Section A: General, Atomic and Solid State Physics* **245**, 127–132 (1998).
6. Medvedovski, E. Alumina-mullite ceramics for structural applications. *Ceram Int* **32**, 369–375 (2006).
7. Alpert, C. P., Chan, H. M., Bennison, S. J. & Lawn, B. Temperature Dependence of Hardness of Alumina-Based Ceramics. *Journal of the American Ceramic Society* **71**, C-371-C-373 (1988).
8. Xie, Z., Xue, W., Chen, H. & Huang, Y. Mechanical and thermal properties of 99% and 92% alumina at cryogenic temperatures. *Ceram Int* **37**, 2165–2168 (2011).
9. Takeuchi, S. Bulk mechanical properties of quasicrystals. *Materials Research Society Symposium - Proceedings* **553**, 283–294 (1999).
10. Dolinšek, J. Electrical and thermal transport properties of icosahedral and decagonal quasicrystals. *Chem Soc Rev* **41**, 6730–6744 (2012).
